# Supplementary material
Source: PubMed Central journal article supplement (PMC3541283)
Supplement: auto-8-1712-s01.pdf [file auto-8-1712-s01.pdf]

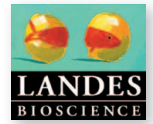

## **Supplemental Material to:**

**SJingyi Zhou, Wenjuan Liao, Jing Yang, Ke Ma, Xue Li,  
Yachen Wang, Donglai Wang, Lina Wang, Yu Zhang, Yuxin  
Yin, Ying Zhao and Wei-Guo Zhu**

**FOXO3 induces FOXO1-dependent autophagy  
by activating the AKT1 signaling pathway**

**Autophagy 2012; 8(12)**

**<http://dx.doi.org/10.4161/auto.21830>**

**[www.landesbioscience.com/journals/autophagy/article/21830](http://www.landesbioscience.com/journals/autophagy/article/21830)**

**Figure S1**

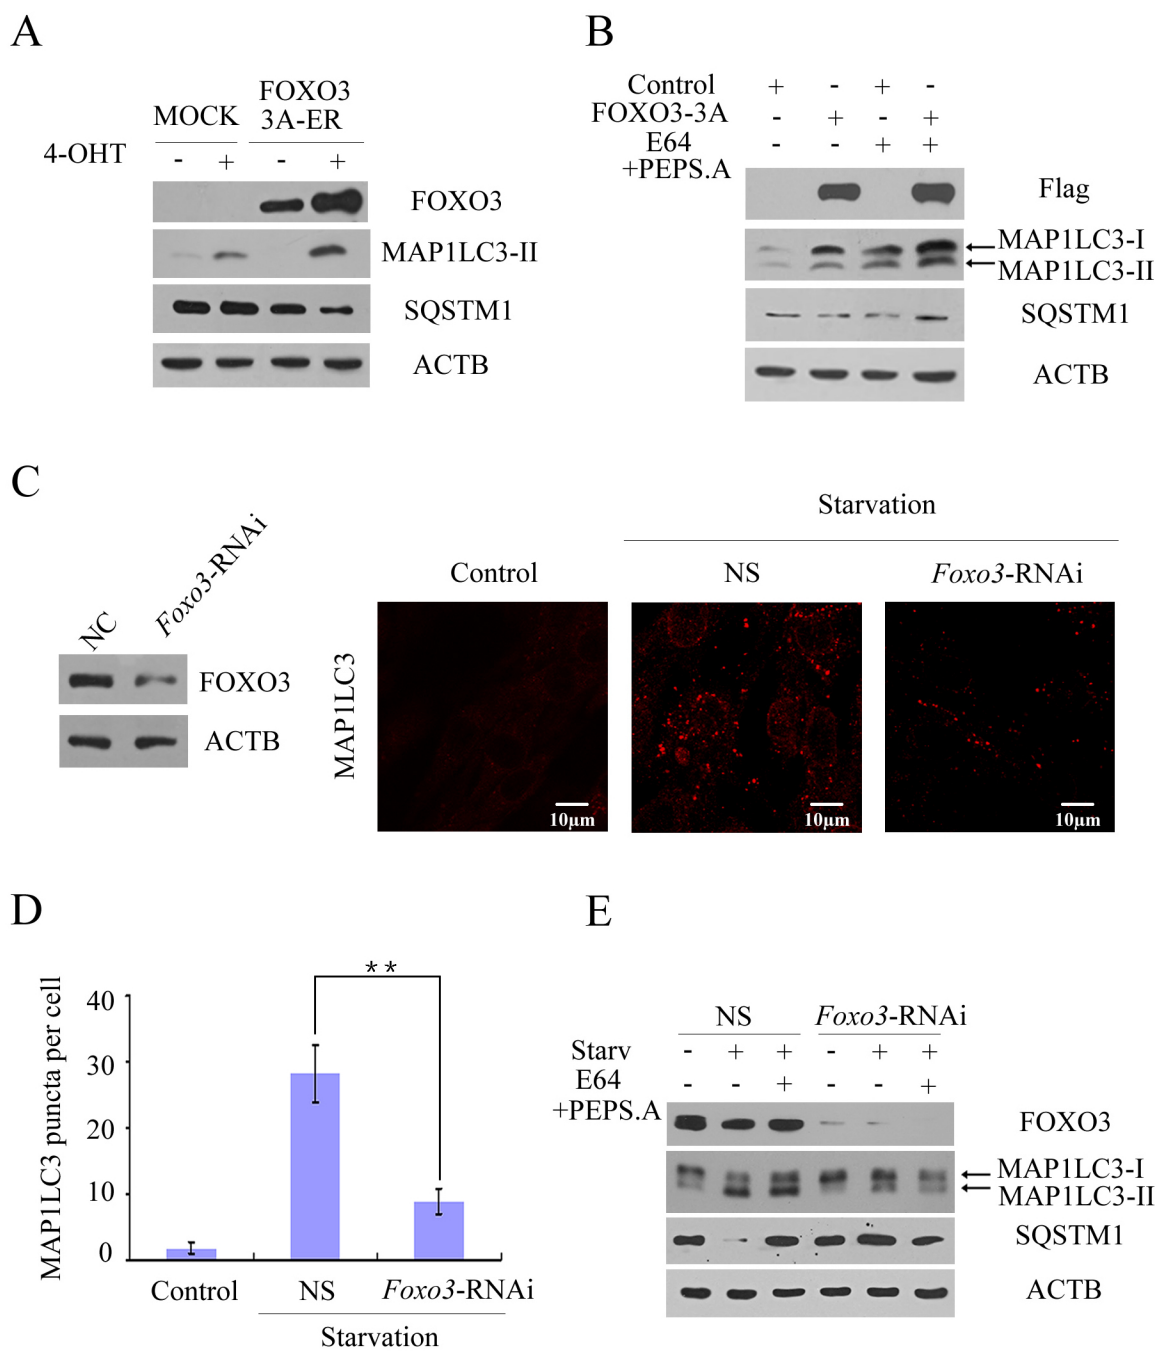

**Figure S2**

**A**

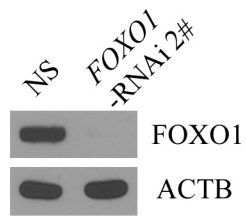

**B**

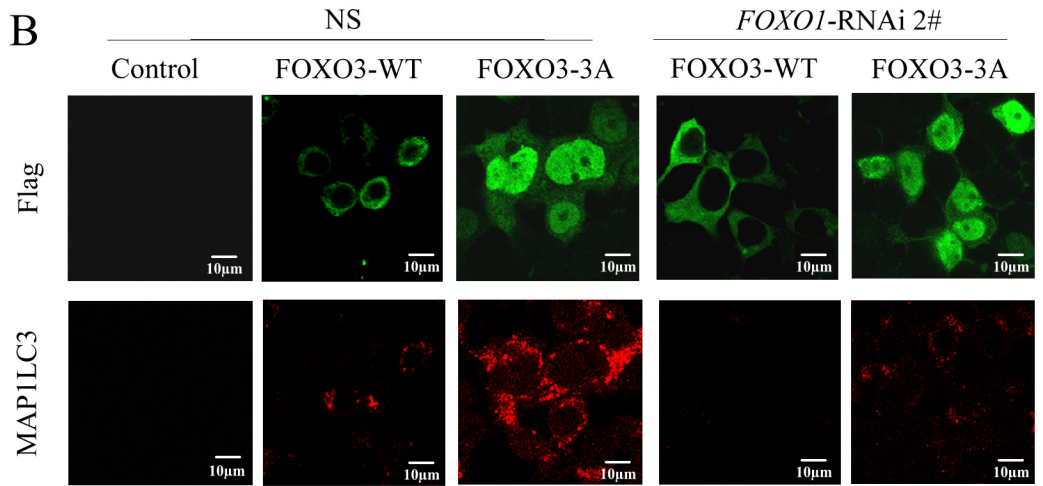

**C**

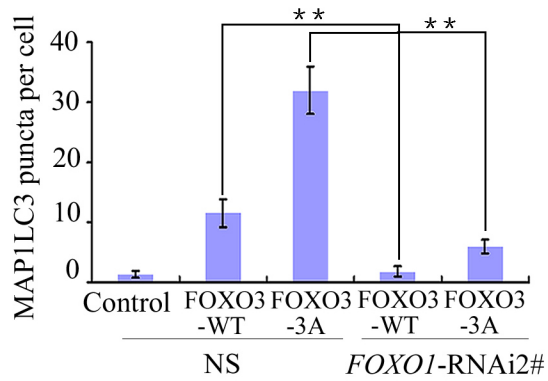

**D**

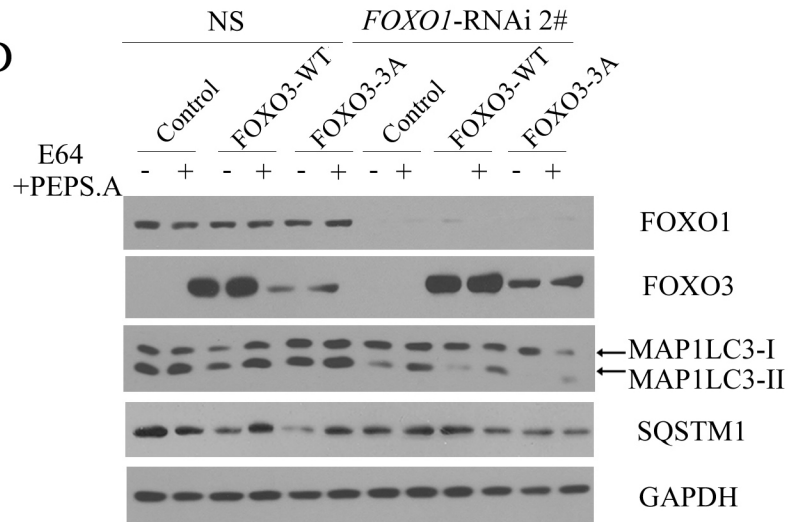

**Figure S1.** FOXO3 triggered autophagy in MEF cells and C2C12 cells. (A) Wild-type MEF cells or TM-ER MEF cells were treated with or without 4-OHT (20 mg/ml). 6 h post-transfection, cell lysates were extracted and were then analyzed by western blot with anti-FOXO3, anti-MAP1LC3, anti-SQSTM1 or anti-ACTB antibody. (B) C2C12 cells were transfected with empty control plasmid or Flag-FOXO3 (3A) plasmid in the presence or absence of E64 and pepstatin A. 48 h post-transfection, cell lysates were extracted and analyzed by western blot with anti-Flag, anti-MAP1LC3, anti-SQSTM1 or anti-ACTB antibody. (C) C2C12 cells were transfected with nonspecific siRNA or *Foxo3* siRNA. 48 h post-transfection, cells were HBSS-starved or further cultured in a complete medium for 2 h. A western blot was performed to detect the expression of FOXO3 (left panels). Endogenous MAP1LC3 puncta (right panels) were observed by confocal microscopy. Scale bars, 10  $\mu$ m. (D) Quantification of endogenous MAP1LC3 puncta per cell. Error bars represent the standard deviation (n=50 for three independent experiments). \*\*p<0.01. (E) Nonspecific siRNA or *Foxo3* siRNA was transfected into C2C12 cells. 48 h post-transfection, cells were HBSS-starved or further cultured in complete medium for 2 h with or without E64 and pepstatin A. Cell lysates were extracted and immunoblotted with anti-FOXO3, anti-MAP1LC3, anti-SQSTM1 or anti-GAPDH antibody.

**Figure S2.** FOXO1 is required for FOXO3-induced autophagy (using a different *FOXO1* siRNA sequence). (A) Stable *FOXO1*-RNAi HEK293T cell lines transfected with different *FOXO1* RNAi oligonucleotides were established. Western blot analysis of FOXO1 expression in stable nonspecific-RNAi-expressing HEK293T cells (NS) and stable *FOXO1*-siRNA HEK293T cells (*FOXO1*-RNAi). (B) Empty control, Flag-FOXO3 (WT) or Flag-FOXO3 (3A) plasmid was transfected into NS cells or *FOXO1*-RNAi cells. Expression of Flag-FOXO3 (upper panels) or endogenous MAP1LC3 puncta (lower panels) was analyzed by confocal microscopy. Scale bars, 10  $\mu$ m. (C) Quantification of endogenous MAP1LC3 puncta per cell. Error bars represent the standard deviation (n=50 for three independent experiments). \*\*p<0.01. (D) HEK293T (NS) cells or *FOXO1*-RNAi cells were transfected with control plasmid, Flag-FOXO3 (WT) or Flag-FOXO3 (3A) plasmid and were then treated with or without E64 and pepstatin A. 48 h post-transfection, cell lysates were extracted and were immunoblotted with anti-FOXO1, anti-FOXO3, anti-MAP1LC3, anti-SQSTM1 or anti-GAPDH antibody.
